# Supplementary material for: Differential Attraction of Malaria Mosquitoes to Volatile Blends Produced by Human Skin Bacteria
Source: PubMed Central journal article supplement (PMC3012726; doi:10.1371/journal.pone.0015829), 2010-12-30
Supplement: pone.0015829.s002.pdf [file pone.0015829.s002.pdf]

## Figure S2 GC-MS chromatograms of medium and bacterial headspace

Figure S2A Total ion chromatogram of medium headspace and compounds identified. Largest peaks are indicated with a letter which corresponds with the list of compounds below.

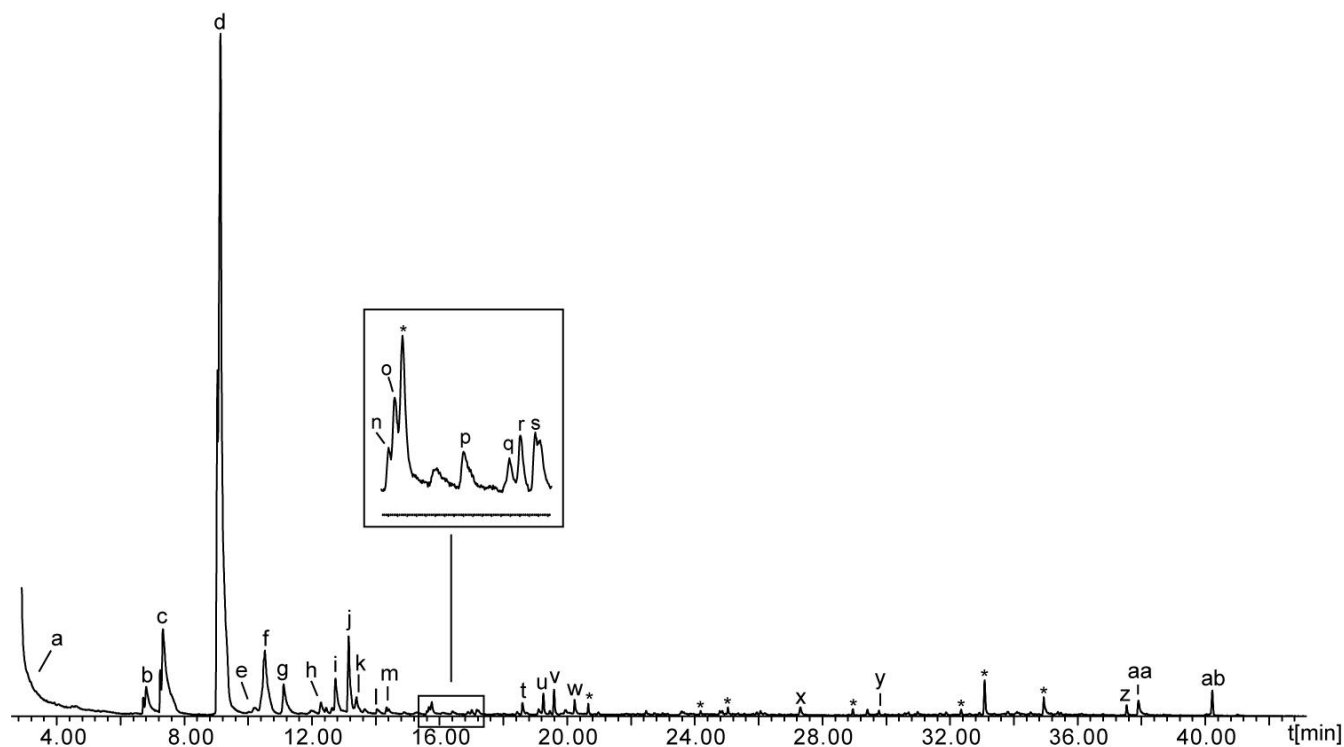

| GC <sup>a)</sup> | Compound                      | Retention index <sup>b)</sup> | Intensity |
|------------------|-------------------------------|-------------------------------|-----------|
| a                | 1-Butanol                     | n.d. <sup>c)</sup>            | ++++      |
| b                | Cyclohexanone                 | 901                           | ++        |
| c                | 2,5-Dimethylpyrazine          | 915                           | +++       |
| d                | Benzaldehyde                  | 963                           | ++++      |
| e                | Butylbutyrate                 | 997                           | ++        |
| f                | Trimethylpyrazine             | 999                           | +++       |
| g                | 2-Acetylthiazol               | 1016                          | ++        |
|                  | 2-Hydroxybenzaldehyde         | 1040                          | +         |
| h                | Pyrazin M: 136                | 1050                          | ++        |
|                  | m/z: 57, 85, 41, 129          | 1055                          | +         |
|                  | m/z: 57, 85, 41, 129          | 1060                          | +         |
| i                | Acetophenone                  | 1063                          | ++        |
| j                | 2-Ethyl-3,6-dimethylpyrazine  | 1075                          | ++        |
| k                | Pyrazin M: 136                | 1082                          | ++        |
| l                | Nonanal                       | 1104                          | ++        |
| m                | m/z: 43, 123, 101, 138        | 1111                          | +         |
|                  | m/z: 43, 69, 131, 114, 85     | 1113                          | +         |
| n                | Pyrazin M: 164                | 1151                          | ++        |
| o                | 2,6-Di-(1-Methylethyl)pyrazin | 1153                          | ++        |
| *                | Silnoxan                      | 1156                          | ++        |

|    |                                          |      |    |
|----|------------------------------------------|------|----|
| p  | Naphthalene                              | 1176 | ++ |
| q  | Pyrazin, M=164                           | 1193 | ++ |
| r  | Dimethyl-(2-methylpropyl)-pyrazine M=164 | 1196 | +  |
| s  | Decanal                                  | 1201 | +  |
|    | m/z: 107, 135, 91, 150, 80               | 1203 | +  |
| t  | 2-Butyl-3,6-dimethylpyrazine             | 1253 | ++ |
|    | $\alpha$ -Ethylidenebenzeneacetaldehyde  | 1272 | ++ |
| u  | m/z: 145, 76, 120, 46, 192               | 1277 | ++ |
|    | Isobornylacetate                         | 1285 | ++ |
| v  | m/z: 145, 118, 192, 46                   | 1289 | ++ |
|    | Pyrazine                                 | 1302 | ++ |
| w  | 2,5-Dimethyl-3-(3-methylbutyl)-pyrazine  | 1313 | ++ |
| *  | Siloxane*                                | 1329 | ++ |
| *  | Unknown                                  | 1465 | ++ |
|    | Hexasulfur                               | 1487 | ++ |
|    | Pentadecane                              | 1498 | +  |
| *  | Cyclosiloxane*                           | 1499 | +  |
|    | sesquiterpene                            | 1513 | +  |
|    | m/z: 71, 57, 85, 43, 99                  | 1537 | +  |
|    | m/z: 205, 190, 174, 73                   | 1542 | +  |
| x  | Hexadecane                               | 1596 | ++ |
| *  | Cyclosiloxane                            | 1669 | +  |
| y  | Hydrocarbon                              | 1706 | +  |
| *  | Unknown                                  | 1829 | +  |
|    | m/z: 157, 143, 185, 270                  | 1857 | +  |
| *  | Bis(2-methylpropyl)phthalat              | 1866 | ++ |
|    | m/z: 205, 217, 220, 175                  | 1917 | +  |
|    | m/z: 160, 145, 270, 95, 105              | 1943 | +  |
| *  | Dibutylphthalat                          | 1961 | ++ |
|    | m/z: 239, 183, 253, 268                  | 1988 | +  |
| z  | 2-Ethylhexyl dodecanoate,*               | 2099 | ++ |
| aa | m/z: 121, 179, 137, 292                  | 2120 | ++ |
| ab | m/z: 149, 91, 121, 79                    | 2253 | ++ |
|    | m/z: 112, 70, 57                         | 2300 | +  |

<sup>a</sup>)Peak in chromatogram, <sup>b</sup>)Abundance relative to the largest peak in the total ion chromatogram: + 0 – 0.5%; ++ 0.5 – 10%; +++ 10 – 30%; ++++ 30 – 100%, <sup>c</sup>)not determined, \*) artifact

**Figure S2B Total ion chromatogram and compounds identified of *C. minutissimum* headspace.**

Largest peaks are indicated with a letter which corresponds with the list of compounds below.

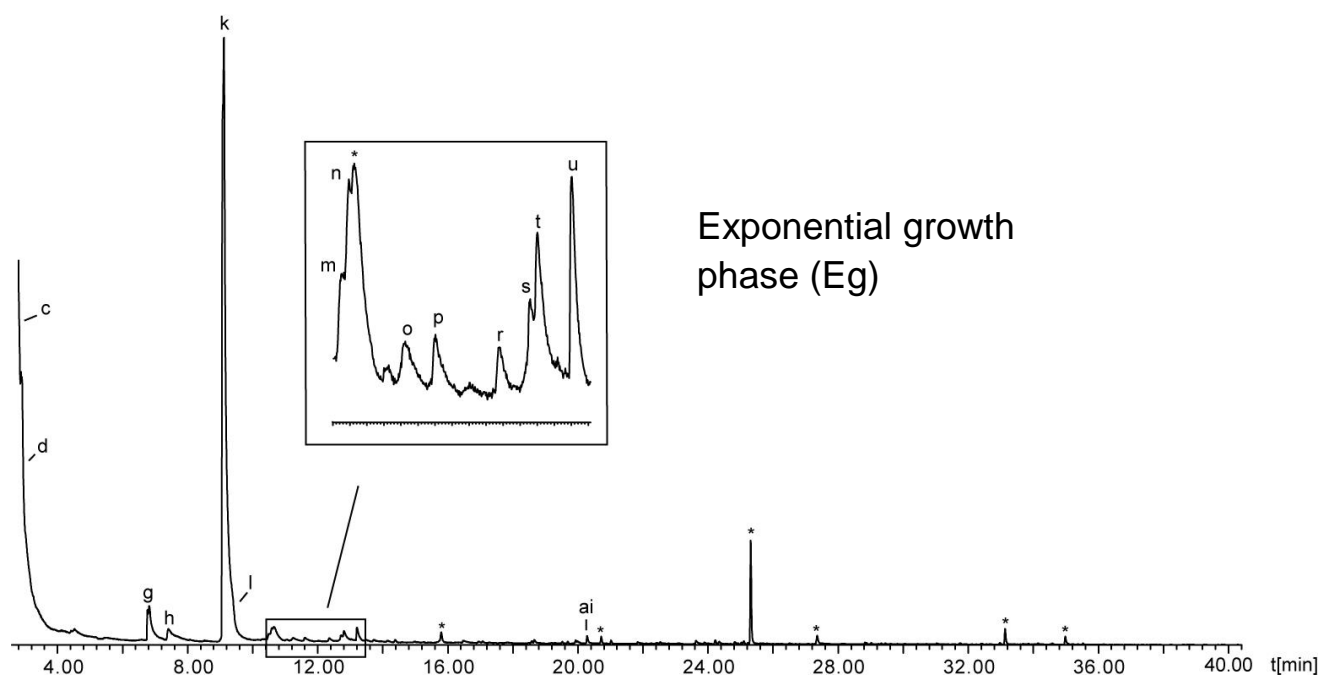

Exponential growth phase (Eg)

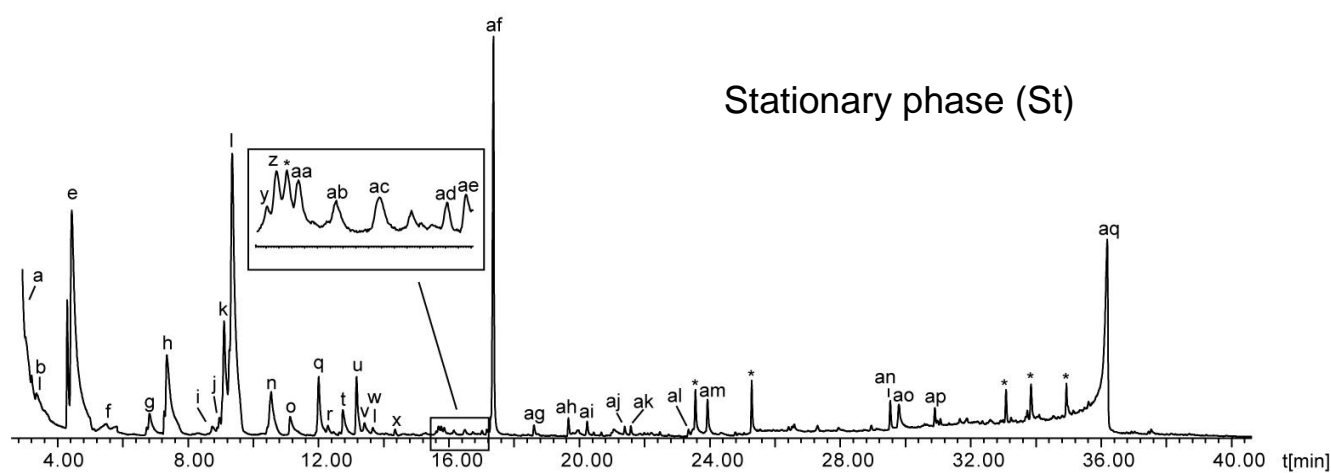

Stationary phase (St)

| GC <sup>a)</sup> | Compound                         | Retention index <sup>b)</sup> | Intensity |      |
|------------------|----------------------------------|-------------------------------|-----------|------|
|                  |                                  |                               | Eg        | St   |
| a                | Ethylacetate*                    | n.d. <sup>c)</sup>            |           | ++++ |
| b                | Toluol                           | n.d.                          |           | ++   |
| c                | 1-Butanol                        | n.d.                          | ++        |      |
| d                | 3-Methyl-1-butanol               | n.d.                          | ++        |      |
| e                | Butylacetate                     | 826                           |           | ++++ |
| f                | 3-Methylbutanoic acid            | 863                           |           | ++   |
| g                | Cyclohexanone                    | 901                           | ++        | ++   |
| h                | 2,5-Dimethylpyrazine             | 915                           | ++        | ++++ |
| i                | 3-Hydroxy-2-heptanon or isomeric | 952                           |           | ++   |
| j                | Butylisobutyrate                 | 958                           |           | ++   |

|    |                                           |      |      |      |
|----|-------------------------------------------|------|------|------|
| k  | Benzaldehyde                              | 963  | ++++ | ++++ |
| l  | Dimethyltrisulfide                        | 968  | ++   | ++++ |
| m  | Butylbutyrate                             | 997  | +    |      |
| n  | Trimethylpyrazine                         | 999  | ++   | +++  |
| o  | 2-Acetylthiazol                           | 1016 | +    | ++   |
| p  | 2-Ethyl-1-hexanol*                        | 1029 | +    |      |
| q  | Butyl-2-methylbutanoate                   | 1042 |      | +++  |
| r  | Pyrazine, M: 136                          | 1050 | +    | ++   |
| s  | S-Methylmethanthiosulphonate              | 1062 | +    |      |
| t  | Acetophenone                              | 1063 | ++   | ++   |
| u  | 2-Ethyl-3,6-dimethylpyrazine              | 1075 | ++   | +++  |
| v  | Pyrazine, M: 136                          | 1082 |      | ++   |
| w  | m/z: 123, 58, 43, 138                     | 1090 |      | ++   |
| x  | m/z: 43, 123, 101, 138                    | 1111 | +    | ++   |
| y  | 2,6-Di(1-Methylethyl)pyrazine             | 1153 |      | ++   |
| z  | Pyrazine M: 150                           | 1155 | +    | ++   |
| *  | Silanoxane                                | 1156 | ++   |      |
| aa | 7-Methyl-2-nonanone                       | 1160 |      | ++   |
| ab | Methyl(2-methyl-3-furyl)disulfide         | 1168 |      | +    |
| ac | m/z: 160, 91, 45                          | 1179 |      | +    |
|    | Pyrazine, M=164                           | 1193 | +    |      |
| ad | Dimethyl-(2-methylpropyl)-pyrazine, M=164 | 1196 | +    |      |
| ae | Decanal                                   | 1201 |      | ++   |
| af | Dimethyltetrasulfide                      | 1208 |      | ++++ |
| ag | 2-Butyl-3,6-dimethylpyrazine              | 1253 | +    | ++   |
|    | Isobornylacetate                          | 1285 | +    |      |
| ah | 2-Undecanone                              | 1292 |      | ++   |
|    | m/z: 57, 143, 87, 69, 159                 | 1301 | +    |      |
|    | Pyrazine                                  | 1302 | +    | +    |
| ai | 2,5-Dimethyl-3-(3-methylbutyl)-pyrazine   | 1313 | +    | ++   |
|    | m/z: 69, 43, 85, 111, 154                 | 1321 |      | +    |
|    | m/z: 138, 95, 83, 193, 57                 | 1340 | +    |      |
| aj | 10-Methyl-2-undecanone                    | 1359 |      | +    |
| ak | 9-Methyl-2-undecanone                     | 1363 |      | ++   |
|    | Artifact                                  | 1371 | +    |      |
|    | Tetradecane                               | 1397 | +    | +    |
| al | Isobutyl-2-phenylacetate                  | 1432 |      | ++   |
|    | Pentathiane                               | 1437 |      | ++   |
| am | Dimethylpentasulfide                      | 1455 |      | ++   |
|    | Artifact                                  | 1465 | +    |      |
|    | Artifact                                  | 1470 | +    |      |
|    | Hexasulfur                                | 1487 | +    |      |
|    | 5-Methyl-2-phenyl-2-hexenal               | 1488 | +    | +    |
|    | 12-Methyl-2-tridecanone                   | 1557 |      | +    |
|    | 11-Methyl-2-tridecanone                   | 1567 |      | ++   |
|    | Hexadecane                                | 1596 | +    | ++   |
|    | Lenthionine                               | 1623 |      | +    |
|    | Cyclosiloxane                             | 1669 |      | ++   |
| an | 2-Pentadecanone                           | 1695 |      | ++   |
| ao | Hexathiepane                              | 1707 |      | ++   |

|    |                              |      |    |      |
|----|------------------------------|------|----|------|
| ap | 14-Methyl-2-pentadecanone    | 1760 |    | ++   |
|    | Octadecane                   | 1796 |    | ++   |
|    | m/z: 253, 268, 185, 171, 85  | 1800 | +  |      |
|    | m/z: 229, 145, 159, 161, 119 | 1802 |    | ++   |
|    | m/z: 157, 143, 185, 270      | 1857 | +  |      |
| *  | Bis(2-methylpropyl)phthalat* | 1866 | ++ | ++   |
|    | Heptadecen-2-on              | 1874 |    | ++   |
|    | Nonadecan                    | 1896 |    | ++   |
| *  | Di-2-pyridinylethanedion*    | 1906 |    | ++   |
| *  | Dibutylphthalat*             | 1961 | +  | ++   |
|    | m/z: 239, 183, 253, 268      | 1988 | +  |      |
|    | Eicosane                     | 1995 |    | ++   |
| aq | Octasulfur                   | 2025 |    | ++++ |

<sup>a)</sup>Peak in chromatogram, <sup>b)</sup>Abundance relative to the largest peak in the total ion chromatogram: + 0 – 0.5%; ++ 0.5 – 10%; +++ 10 – 30%; +++++ 30 – 100%, <sup>c)</sup>not determined, \*) artifact, grey shading – also identified in medium.

**Figure S2C Total ion chromatogram and compounds identified of *B. subtilis* headspace.**  
Largest peaks are indicated with a letter which corresponds with the list of compounds below.

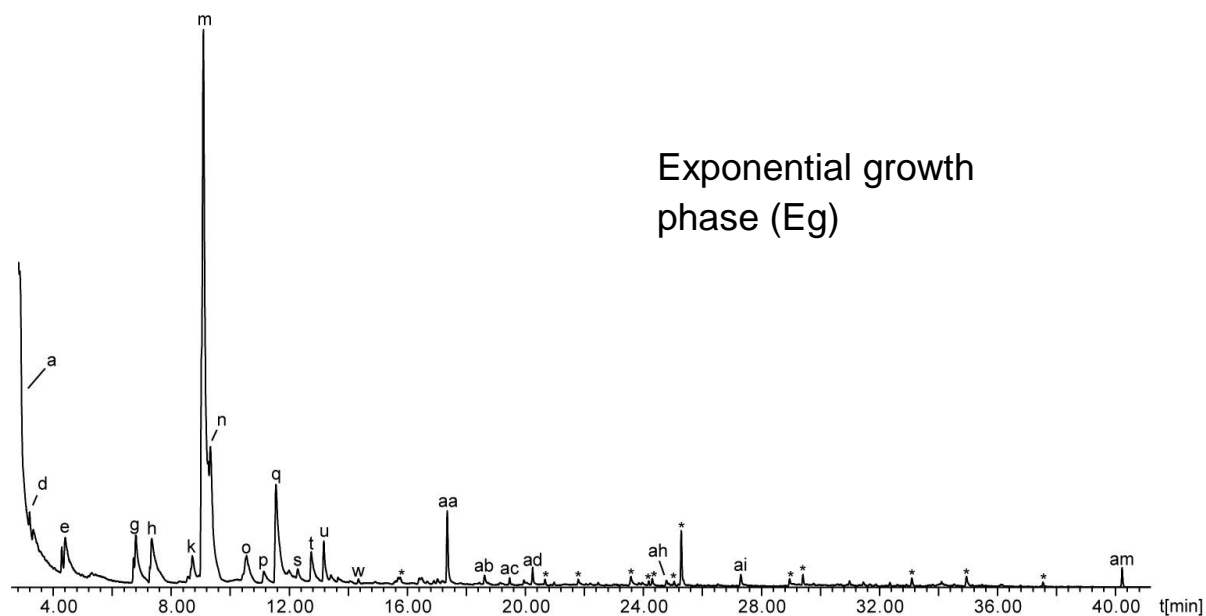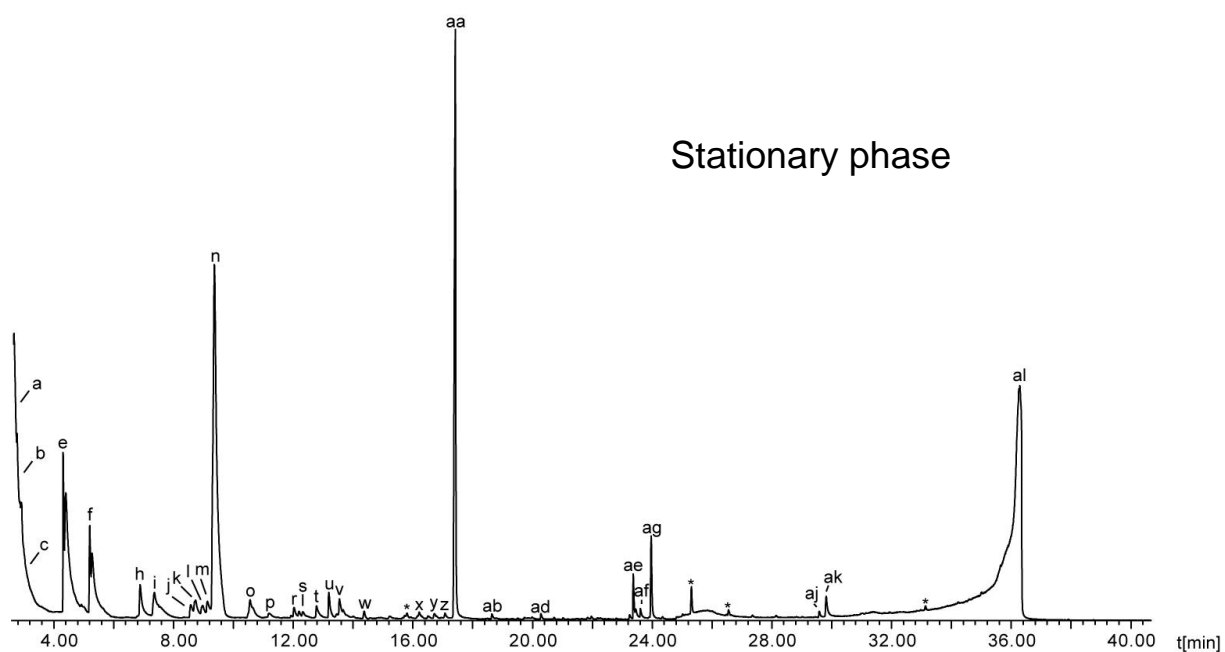

| GC <sup>a)</sup> | Compound           | Retention index <sup>b)</sup> | Intensity |      |
|------------------|--------------------|-------------------------------|-----------|------|
|                  |                    |                               | A         | B    |
| a                | Acetoin            | n.e. <sup>c)</sup>            | ++        | ++   |
| b                | 3-Methyl-1-butanol | n.e.                          |           | ++   |
| c                | Dimethyldisulfide  | n.e.                          |           | ++   |
| d                | Toluol             | n.e.                          | ++++      |      |
| e                | Butylacetate       | 826                           | +++       | ++++ |
| f                | m/z: 88, 43, 55    | 854                           |           | +++  |
| g                | Cyclohexanone      | 901                           | +++       |      |

|    |                                          |      |      |      |
|----|------------------------------------------|------|------|------|
| h  | 3-(Acetyloxy)-2-butanone                 | 903  |      | ++   |
| i  | 2,5-Dimethylpyrazine                     | 915  | +++  | ++   |
| j  | 2-Hydroxy-3-heptanon or isomere          | 947  |      | ++   |
| k  | 3-Hydroxy-2-heptanon or isomere          | 952  | ++   | ++   |
| l  | Butylisobutyrate                         | 958  |      | ++   |
| m  | Benzaldehyde                             | 963  | ++++ | ++   |
| n  | Dimethyltrisulfide                       | 968  | ++++ | ++++ |
| o  | Trimethylpyrazine                        | 999  | ++   | ++   |
| p  | 2-Acetylthiazol                          | 1016 | ++   | ++   |
| q  | 2-Ethyl-1-hexanol*                       | 1029 | +++  |      |
|    | Ethyl-2-isopropyl-2-butenolate           | 1042 | ++   |      |
| r  | Butyl-2-methylbutanoate                  | 1042 |      | ++   |
| s  | Pyrazine, M: 136                         | 1050 | ++   | ++   |
| t  | Acetophenone                             | 1063 | ++   | ++   |
| u  | 2-Ethyl-3,6-dimethylpyrazine             | 1075 | ++   | ++   |
|    | Pyrazine, M: 136                         | 1082 | +    | ++   |
| v  | 2-Methoxyphenol                          | 1087 |      | ++   |
|    | Ethylbenzenediol                         | 1090 | +    | ++   |
| w  | m/z: 43, 123, 101, 138                   | 1111 | +    | ++   |
|    | m/z: 132, 67, 99, 53, 39                 | 1139 |      | +    |
|    | m/z: 97, 59, 140                         | 1150 | +    |      |
|    | Pyrazine, M: 150                         | 1151 | +    | +    |
|    | 2,6-Di(1-Methylethyl)pyrazine            | 1153 | +    | +    |
| *  | Silnoxane                                | 1156 | +    | +    |
| x  | Unknown, MW: 150                         | 1170 |      | ++   |
|    | Naphthalene                              | 1176 | +    |      |
| y  | Tetrathiolane                            | 1187 |      | +    |
| z  | Dimethyl-(2-methylpropyl)-Pyrazine M=164 | 1196 |      | ++   |
| aa | Dimethyltetrasulfide                     | 1208 | ++   | ++++ |
| ab | 2-Butyl-3,6-dimethylpyrazine             | 1253 | ++   | ++   |
| ac | Isobornylacetate                         | 1285 | ++   | +    |
|    | 2-Undecanone                             | 1292 |      | +    |
|    | Pyrazine                                 | 1302 | +    |      |
| ad | 2,5-Dimethyl-3-(3-methylbutyl)-pyrazine  | 1313 | ++   | ++   |
| *  | Siloxane                                 | 1329 | +    | +    |
|    | m/z: 138, 95, 83, 193, 57                | 1340 | +    | +    |
| *  | Unknown                                  | 1371 | +    | +    |
|    | m/z: 91, 71, 99, 117, 55                 | 1379 |      | +    |
|    | Pyrazine                                 | 1388 |      | +    |
|    | m/z: 113, 192, 45, 136,                  | 1390 |      | +    |
|    | m/z: 71, 117, 43                         | 1428 |      | ++   |
| ae | Isobutyl-2-phenylacetate                 | 1432 |      | ++   |
| af | Pentathiane                              | 1437 |      | ++   |
| *  | Unknown                                  | 1442 | ++   | ++   |
| ag | Dimethylpentasulfide                     | 1455 |      | ++   |
| *  | Unknown                                  | 1465 | ++   |      |
| *  | Cyclohexadien-1,4-dion-Derivate          | 1470 | +    | +    |
| ah | 5-Methyl-2-phenyl-2-hexenal              | 1488 | +    |      |
|    | Pentadecane                              | 1498 |      | +    |
| *  | Cyclosiloxane                            | 1499 | +    |      |

|    |                                     |      |    |      |
|----|-------------------------------------|------|----|------|
|    | * 2,4-Bis(1,1-dimethylethyl)-phenol | 1509 | ++ | ++   |
| ai | Hexadecane                          | 1596 | ++ |      |
|    | * Cyclosiloxane                     | 1669 | +  |      |
| aj | 2-Pentadecanone                     | 1695 |    | ++   |
| ak | Hexathiepane                        | 1707 |    | ++   |
|    | 14-Methyl-2-pentadecanone           | 1760 | +  |      |
|    | * Unknown                           | 1763 | +  |      |
|    | 13-Methyl-2-pentadecanone           | 1771 | +  |      |
|    | Methyl-13-methyltetradecanoat       | 1786 | +  |      |
|    | * Unknown                           | 1829 | +  |      |
|    | * Bis(2-methylpropyl)phthalate      | 1866 | ++ | +    |
|    | * Dibutylphthalate                  | 1961 | ++ |      |
|    | m/z: 239, 183, 253, 268             | 1988 | +  |      |
| al | Octasulfur                          | 2025 |    | ++++ |
|    | m/z: 237, 195, 241, 221, 252        | 2058 | +  |      |
|    | Dodecanoic acid ethylester          | 2099 | +  |      |
| am | m/z: 149, 91, 121, 79               | 2253 | ++ |      |

<sup>a)</sup>Peak in chromatogram, <sup>b)</sup>Abundance relative to the largest peak in the total ion chromatogram: + 0 – 0.5%; ++ 0.5 – 10%; +++ 10 – 30%; ++++ 30 – 100%, <sup>c)</sup>not determined, \*) artifact, grey shading – also identified in medium.



Figure S2D Total ion chromatogram of *S. epidermidis* headspace and compounds identified

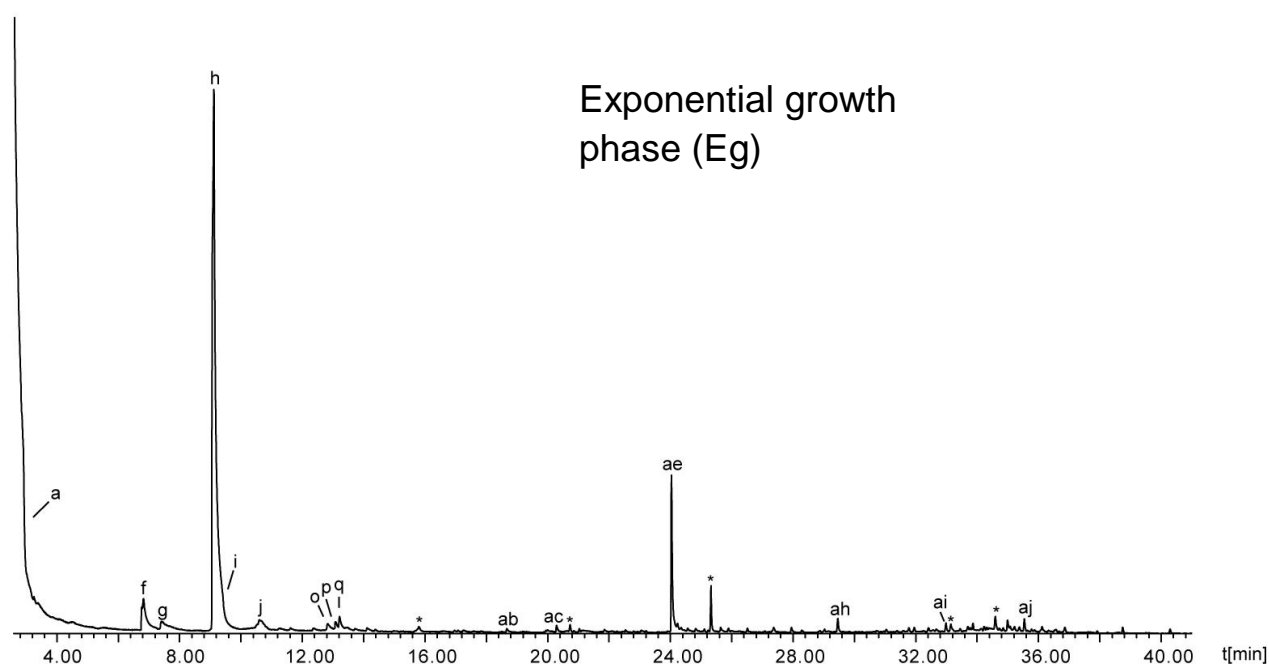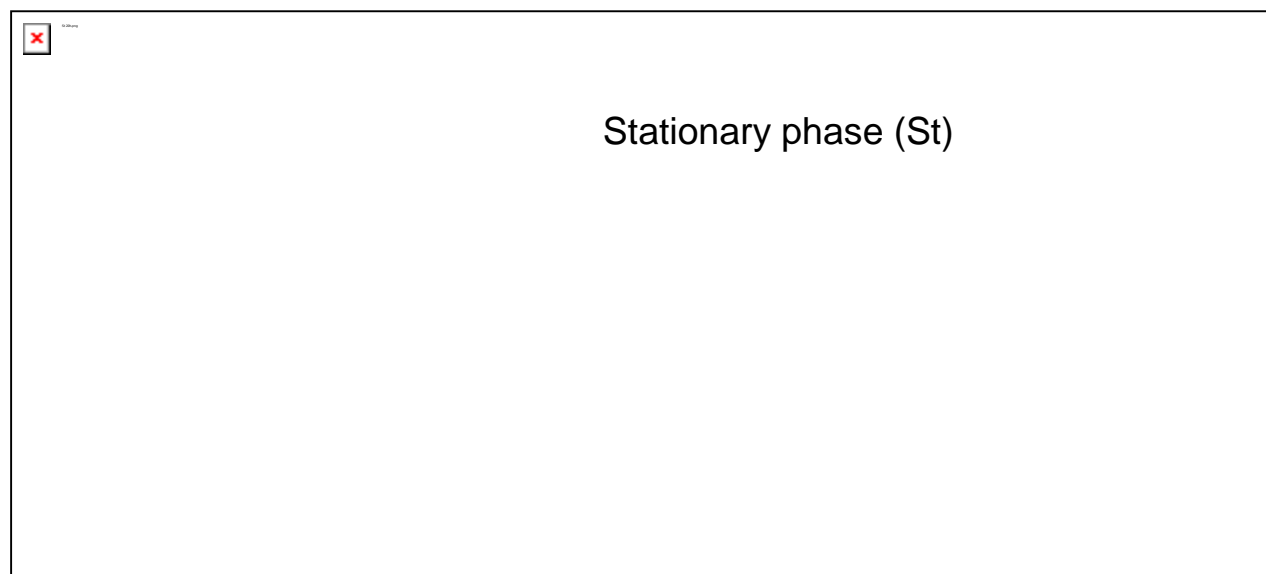

| GC <sup>a)</sup> | Compound <sup>b)</sup> | Retention index <sup>c)</sup> | Intensity |      |
|------------------|------------------------|-------------------------------|-----------|------|
|                  |                        |                               | A         | B    |
| a                | 1-Butanol              | n.e. <sup>c)</sup>            | +++       |      |
| b                | Acetoin                | n.e.                          |           | +++  |
| c                | 3-Methyl-1-butanol     | n.e.                          |           | +++  |
| d                | Dimethyldisulfide      | n.e.                          |           | +++  |
| e                | Butylacetate           | 826                           |           | ++++ |
| f                | Cyclohexanone          | 901                           | ++        | ++   |
| g                | 2,5-Dimethylpyrazine   | 915                           | ++        | +++  |
| h                | Benzaldehyde           | 963                           | ++++      | ++++ |
| i                | Dimethyltrisulfide     | 968                           | +++       | ++++ |

|    |                                          |      |    |     |
|----|------------------------------------------|------|----|-----|
|    | Butylbutyrate                            | 997  | +  | ++  |
| j  | Trimethylpyrazine                        | 999  | +  | ++  |
| k  | 2-Acetylthiazol                          | 1016 |    | ++  |
| l  | 2-Ethyl-1-hexanol*                       | 1029 |    | ++  |
|    | Ethyl 2-isopropyl-2-butenoate            | 1042 |    | +   |
| m  | Butyl-2-methylbutanoate                  | 1042 |    | ++  |
| n  | Pyrazine, M: 136                         | 1050 | +  | ++  |
|    | S-Methyl-methanthiosulphonate            | 1062 |    | +   |
| o  | Acetophenone                             | 1063 | ++ | ++  |
| p  | 5-Nonanone                               | 1073 | ++ | +   |
| q  | 2-Ethyl-3,6-dimethylpyrazine             | 1075 | ++ | ++  |
| r  | Pyrazine, M: 136                         | 1082 |    | ++  |
| s  | Ethylbenzene diol                        | 1090 | +  | ++  |
|    | Nonanal                                  | 1104 | +  | +   |
| t  | m/z: 43, 123, 101, 138                   | 1111 | +  | ++  |
| u  | Phenylacetone nitril                     | 1138 |    | +   |
| v  | Pyrazine, M: 150                         | 1151 |    | +   |
| w  | 2,6-Di(1-Methylethyl)pyrazine            | 1153 |    | ++  |
| x  | 8-Methyl-2-nonanone                      | 1155 |    | ++  |
| *  | Silano xan                               | 1156 | +  | ++  |
|    | 7-Methyl-2-nonanone                      | 1160 |    | +   |
|    | Pyrazine, M=164                          | 1193 | +  |     |
| y  | Dimethyl-(2-methylpropyl)-Pyrazine       | 1196 | +  | ++  |
| z  | Decanal                                  | 1201 |    | ++  |
| aa | Dimethyltetrasulfide                     | 1208 |    | +++ |
| ab | 2-Butyl-3,6-dimethylpyrazine             | 1253 | +  | ++  |
|    | $\alpha$ -Ethylidenebenzeneacetaldehyd e | 1272 |    | +   |
|    | 2-Undecanone                             | 1292 |    | +   |
|    | Indol                                    | 1294 |    | +   |
|    | m/z: 57, 143, 87, 69, 159                | 1301 | +  |     |
|    | Pyrazine                                 | 1302 | +  | +   |
|    | m/z: 57, 143, 87, 159, 69                | 1303 |    | +   |
| ac | 2,5-Dimethyl-3-(3-methylbutyl)-pyrazine  | 1313 | +  | ++  |
|    | m/z: 138, 95, 83, 193, 57                | 1340 | ++ |     |
|    | 10-Methyl-2-undecanone                   | 1359 |    | +   |
|    | 9-Methyl-2-undecanone                    | 1363 |    | +   |
|    | Pyrazine                                 | 1388 |    | +   |
|    | Tetradecane                              | 1397 | +  | +   |
|    | Sesquiterpen: Cadina-1,4-dien            | 1420 |    | +   |
| ad | Dimethylpentasulfide                     | 1455 |    | ++  |
| ae | 6-Pentyl-2H-Pyran-2-on*                  | 1456 |    | ++  |
|    | Cyclohexadien-1,4-dion-derivate*         | 1470 | +  | +   |
|    | 5-Methyl-2-phenyl-2-hexenal              | 1488 | +  | ++  |
|    | 2-Tridecanone                            | 1496 |    | +   |
| *  | Cyclosiloxane                            | 1499 | +  | +   |
|    | 2,4-Bis(1,1-dimethylethyl)-phenol        | 1509 | ++ | ++  |
|    | Dodecanoic acidmethylester               | 1530 | +  | ++  |
|    | m/z: 159, 202, 129, 131                  | 1535 | +  |     |
|    | 12-Methyl-2-tridecanone                  | 1557 |    | +   |
|    | m/z: 193, 55, 222, 95, 43                | 1562 | +  |     |

|    |                               |      |    |    |
|----|-------------------------------|------|----|----|
| af | m/z: 69, 93, 41, 107, 71      | 1563 |    | +  |
|    | 11-Methyl-2-tridecanone       | 1567 |    | +  |
| ag | m/z: 107, 163, 56, 79, 41     | 1586 |    | +  |
|    | Hexadecane                    | 1596 |    | ++ |
| *  | Unknown                       | 1598 | +  |    |
|    | Cyclosiloxane                 | 1669 | +  |    |
| ah | m/z: 109, 135, 82, 123, 93    | 1692 |    | +  |
|    | 2-Pentadecanone               | 1695 |    | +  |
|    | Hexathiepane                  | 1707 |    | +  |
|    | 14-Methyl-2-pentadecanone     | 1760 |    | +  |
|    | m/z: 253, 268, 185, 171, 85   | 1800 | +  |    |
|    | m/z: 229, 145, 159, 161, 119  | 1802 | +  | +  |
| ai | m/z: 143, 157, 270, 185, 200  | 1861 | ++ | +  |
| *  | Bis(2-methylpropyl)phthalate* | 1866 | +  | ++ |
|    | m/z: 119, 105, 272, 204, 91   | 1884 |    | +  |
|    | m/z: 145, 160, 270, 95, 106   | 1905 | ++ | +  |
|    | m/z: 160, 145, 270, 95, 105   | 1943 | ++ | ++ |
|    | m/z: 243, 91, 258, 147, 133   | 1950 |    | +  |
|    | m/z: 243, 91, 119, 161, 105   | 1968 |    | +  |
|    | m/z: 256, 157, 131, 143, 118  | 1975 |    | +  |
| aj | m/z: 239, 183, 253, 268       | 1988 | ++ |    |
|    | 2-Octadecanone                | 2004 |    | +  |
| ak | Octasulfur                    | 2025 |    | ++ |
|    | m/z: 197, 282, 254, 239, 141  | 2121 | +  | ++ |
|    | Diterpene                     | 2168 | ++ | ++ |
|    | m/z: 231, 246, 108, 121, 81   | 2211 |    | +  |
|    | m/z: 121, 91, 79, 105, 93     | 2257 | +  |    |
| al | m/z: 149, 91, 121, 79, 243    | 2257 |    | ++ |

a) Peak in chromatogram, b) Artefacts, c) Abundance relative to the largest peak in the total ion chromatogram: + 0 – 0.5%; ++ 0.5 – 10%; +++ 10 – 30%; ++++ 30 – 100%, d) not determined

Figure S2E Total ion chromatogram of *B. epidermidis* headspace and compounds identified

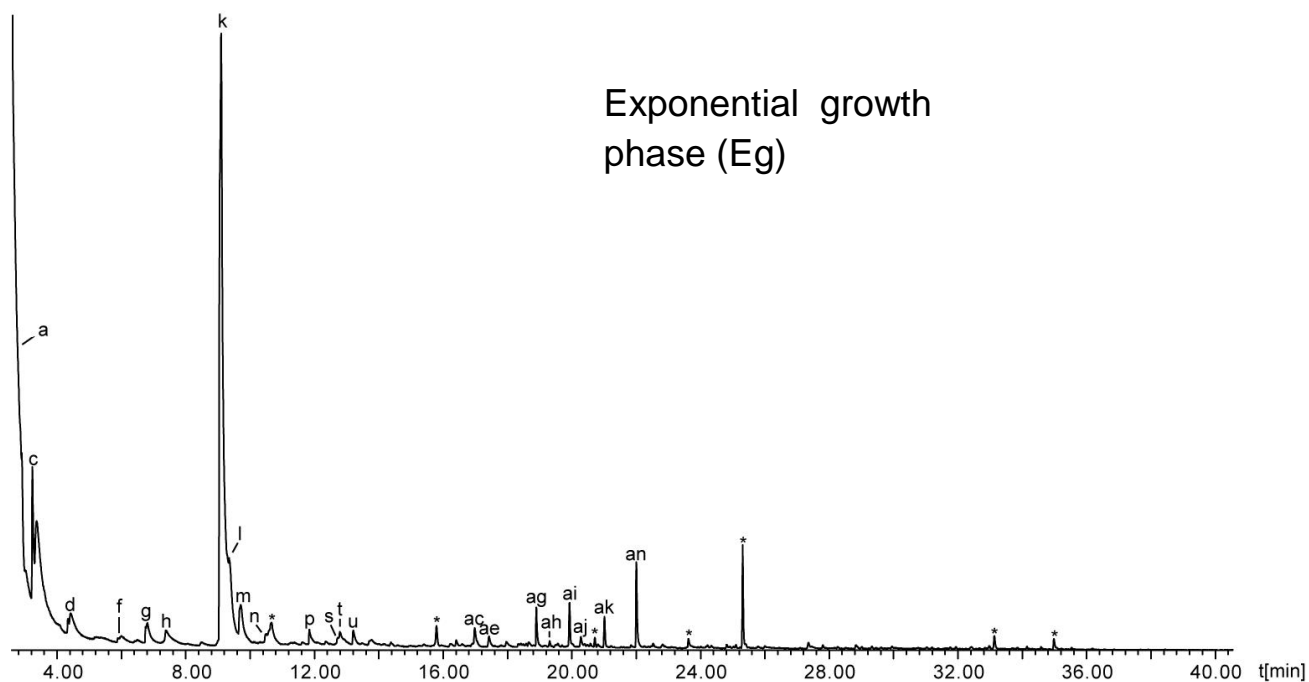

Exponential growth  
phase (Eg)

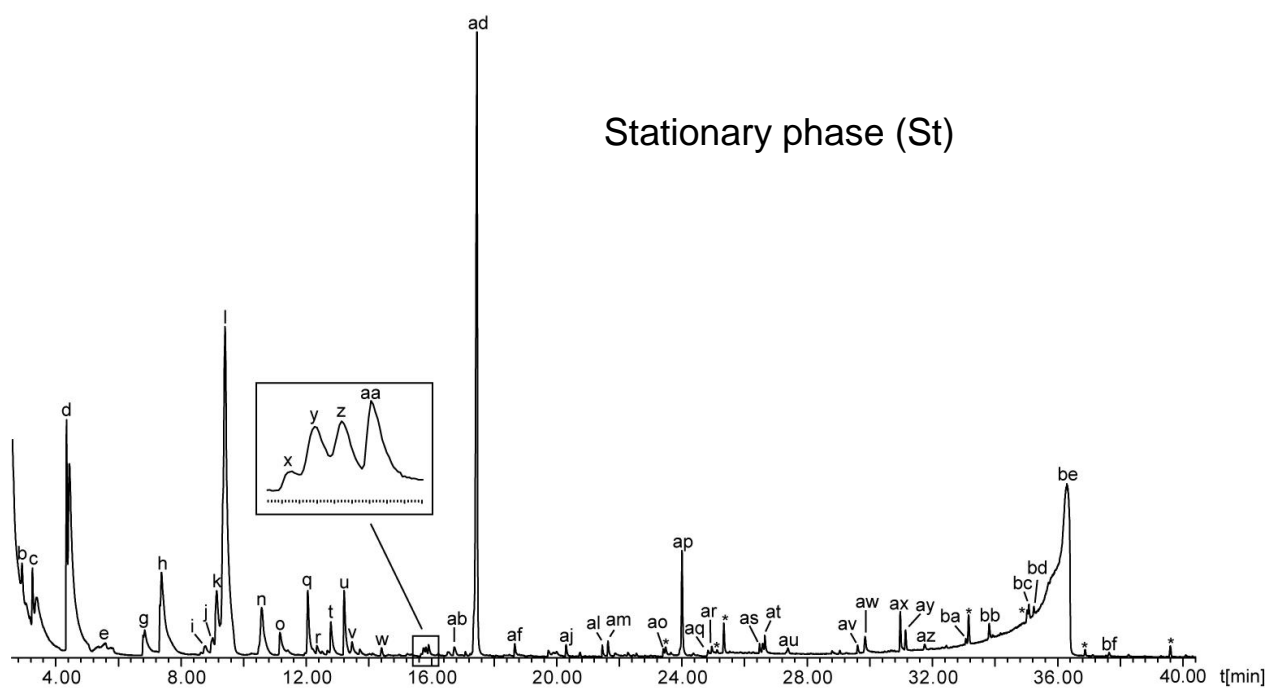

Stationary phase (St)

| GC <sup>a)</sup> | Compound <sup>b)</sup> | Retention index <sup>c)</sup> | Intensity |      |
|------------------|------------------------|-------------------------------|-----------|------|
|                  |                        |                               | A         | B    |
| a                | 1-Butanol              | n.e. <sup>c)</sup>            | ++        |      |
| b                | Dimethylsulfide        | n.e.                          |           | ++   |
| c                | Toluol                 | n.e.                          | +++       | +++  |
| d                | Butylacetate           | 826                           | ++        | ++++ |
| e                | 3-Methylbutanoic acid  | 863                           |           | ++   |
| f                | Xylol                  | 872                           | +         |      |

|    |                                          |      |      |      |
|----|------------------------------------------|------|------|------|
| g  | Cyclohexanone                            | 901  | ++   | ++   |
| h  | 2,5-Dimethylpyrazine                     | 915  | ++   | +++  |
| i  | 3-Hydroxy-2-heptanon or isomere          | 952  |      | ++   |
| j  | Butylisobutyrate                         | 958  |      | ++   |
| k  | Benzaldehyde                             | 963  | ++++ | ++   |
| l  | Dimethyltrisulfide                       | 968  | +++  | ++++ |
| m  | 1,2-Dithiolane                           | 978  | ++   |      |
| n  | Trimethylpyrazine                        | 999  | ++   | ++   |
| *  | Cyclosiloxan                             | 1003 | ++   |      |
| o  | 2-Acetylthiazole                         | 1016 |      | ++   |
| p  | 2,3-Dimethyl-2-cyclopenten-1-one         | 1037 | ++   |      |
| q  | Butyl-2-methylbutanoate                  | 1042 |      | ++   |
| r  | Pyrazine, M: 136                         | 1050 | +    | ++   |
| s  | S-Methyl-methanthiosulphonate            | 1062 | ++   |      |
| t  | Acetophenone                             | 1063 | ++   | ++   |
| u  | 2-Ethyl-3,6-dimethylpyrazine             | 1075 | ++   | ++   |
| v  | Pyrazine, M: 136                         | 1082 |      | ++   |
|    | Ethylbenzenediol                         | 1090 |      | +    |
|    | m/z: 43, 123, 101, 138                   | 1111 | +    | ++   |
| x  | Pyrazine, M: 150                         | 1151 |      | +    |
| y  | 2,6-Di(1-Methylethyl)pyrazine            | 1153 |      | ++   |
| z  | Pyrazine, M: 150                         | 1155 |      | +    |
| *  | Silanoxane                               | 1156 | +    |      |
| aa | 7-Methyl-2-nonanone                      | 1160 |      | +    |
| ab | Tetrathiolane                            | 1187 |      | ++   |
| ac | Sulfur compound                          | 1195 | ++   |      |
|    | Dimethyl-(2-methylpropyl)-pyrazine M=164 | 1196 |      | +    |
| ad | Dimethyltetrasulfide                     | 1208 |      | ++++ |
| ae | Indan Derivate                           | 1210 | ++   |      |
| af | 2-Butyl-3,6-dimethylpyrazine             | 1253 | +    | ++   |
| ag | 1-Chlorodecane                           | 1263 | ++   |      |
| ah | 3-Methyldodecane                         | 1279 | +    |      |
|    | 2-Undecanone                             | 1292 |      | +    |
|    | Indol                                    | 1294 |      | +    |
| ai | m/z: 57, 143, 87, 69, 159                | 1301 | ++   |      |
|    | Pyrazine                                 | 1302 |      | +    |
| aj | 2,5-Dimethyl-3-(3-methylbutyl)-pyrazine  | 1313 | ++   | ++   |
| ak | m/z: 138, 95, 83, 193, 57                | 1340 | ++   |      |
| al | 10-Methyl-2-undecanone                   | 1359 |      | ++   |
| am | 9-Methyl-2-undecanone                    | 1363 |      | ++   |
| an | m/z: 91, 71, 99, 117, 55                 | 1379 | ++   |      |
|    | Pyrazine                                 | 1388 |      | +    |
|    | m/z: 113, 192, 45, 136                   | 1390 |      | +    |
|    | Tetradecane                              | 1397 | +    | +    |
|    | Isobutyl-2-phenylacetate                 | 1432 |      | +    |
| ao | Pentathiane                              | 1437 |      | ++   |
| *  | Unknown                                  | 1442 | ++   |      |
| ap | Dimethylpentasulfide                     | 1455 |      | ++   |
|    | Hexasulfur                               | 1487 | +    | +    |
| aq | 5-Methyl-2-phenyl-2-hexenal              | 1488 | +    | +    |

|    |                                   |      |    |      |
|----|-----------------------------------|------|----|------|
| ar | 2-Tridecanone                     | 1496 |    | +    |
| *  | 2,4-Bis(1,1-dimethylethyl)-phenol | 1509 | ++ | ++   |
| as | 12-Methyl-2-tridecanone           | 1557 |    | ++   |
| at | 11-Methyl-2-tridecanone           | 1567 |    | ++   |
| au | Hexadecane                        | 1596 |    | +    |
|    | m/z: 71, 43, 139, 224, 97         | 1609 | +  |      |
|    | 13-Methyl-2-tetradecanone         | 1662 |    | +    |
| av | 2-Pentadecanone                   | 1695 |    | ++   |
| aw | Hexathiepane                      | 1707 |    | ++   |
| ax | 14-Methyl-2-pentadecanone         | 1760 |    | ++   |
| ay | 13-Methyl-2-pentadecanone         | 1771 |    | ++   |
| az | 2-Hexadecanone                    | 1800 |    | ++   |
| ba | 15-Methyl-2-hexadecanone          | 1865 |    | ++   |
| *  | Bis(2-methylpropyl)phthalat       | 1866 | ++ | ++   |
| bb | 2-Heptadecanone                   | 1902 |    | ++   |
|    | m/z: 160, 145, 270, 95, 105       | 1943 | +  |      |
| *  | Dibutylphthalat                   | 1961 | ++ | ++   |
| bc | 16-Methyl-2-heptadecanone         | 1968 |    | ++   |
| bd | 15-Methyl-2-heptadecanone         | 1976 |    | ++   |
|    | m/z: 239, 183, 253, 268           | 1988 | +  |      |
|    | 2-Octadecanone                    | 2004 |    | +    |
| be | Octasulfur                        | 2025 |    | ++++ |
| bf | 2-Nonadecanone                    | 2105 |    | +    |
| *  | Cyclosiloxan                      | 2217 |    | +    |

a) Peak in chromatogram, b) Artefacts, c) Abundance relative to the largest peak in the total ion chromatogram: + 0 – 0.5%; ++ 0.5 – 10%; +++ 10 – 30%; ++++ 30 – 100%, d) not determined

Figure S2F Total ion chromatogram of *P. aeruginosa* headspace and compounds identified

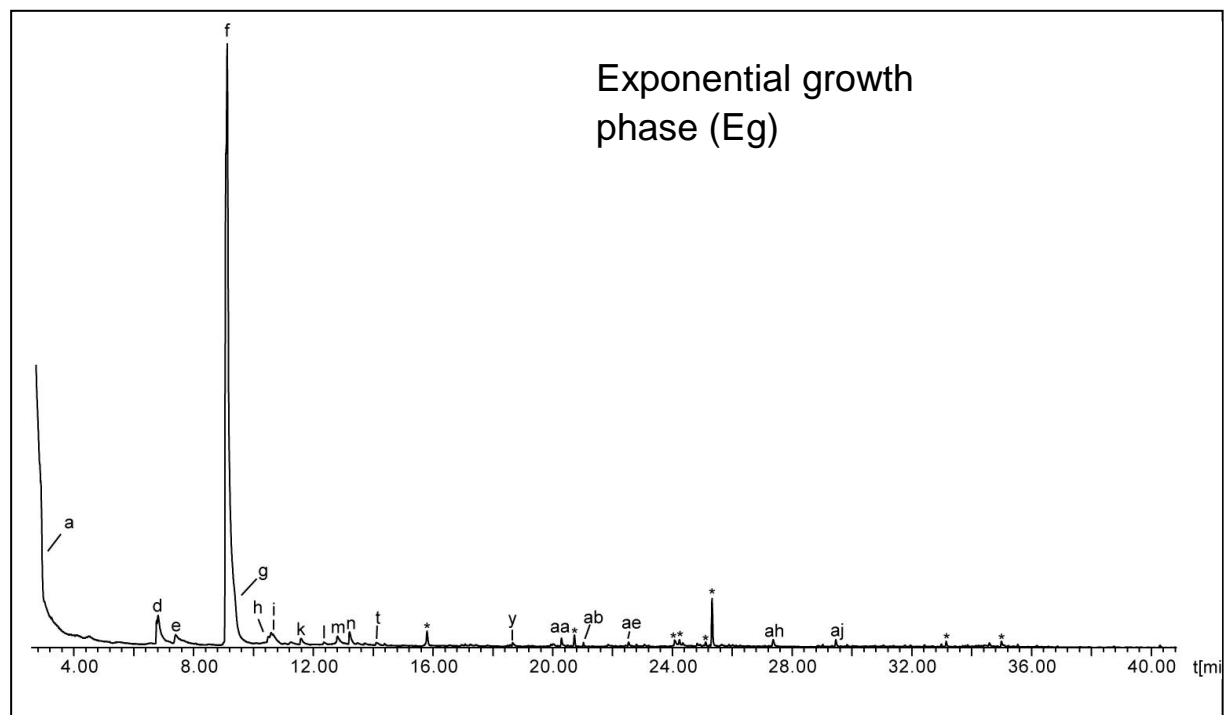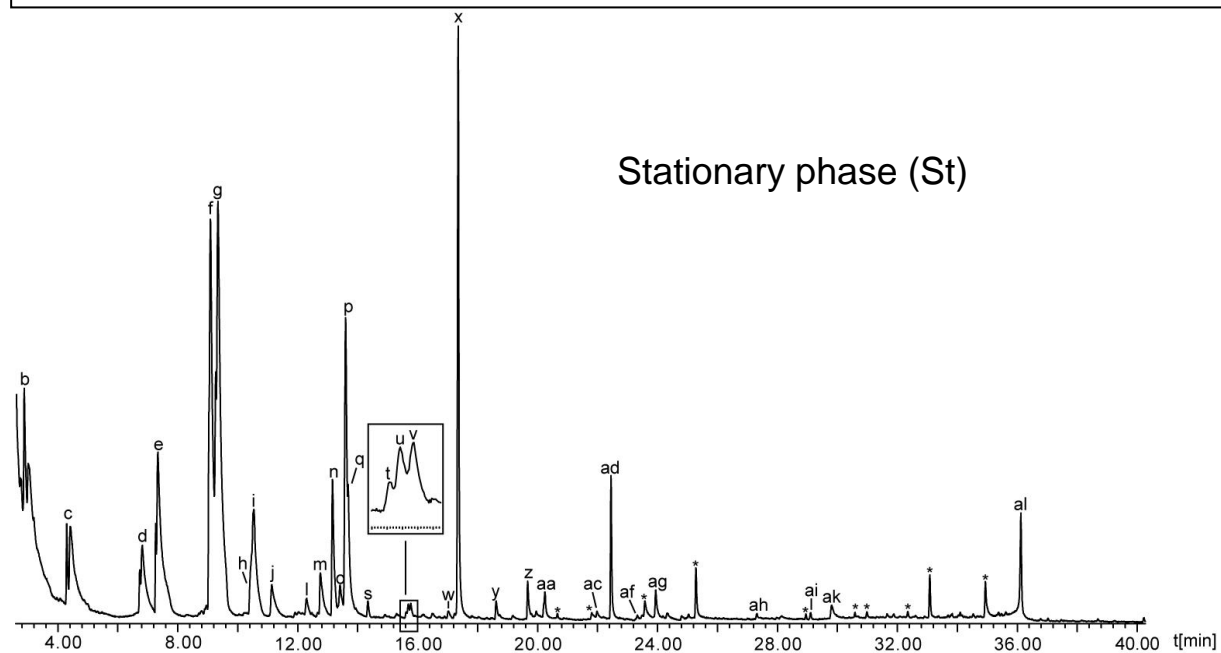

| GC <sup>a)</sup> | Compound <sup>b)</sup> | Retention index <sup>c)</sup> | Intensity |      |
|------------------|------------------------|-------------------------------|-----------|------|
|                  |                        |                               | A         | B    |
| a                | 1-Butanol              | n.e. <sup>c)</sup>            | ++        |      |
| b                | Dimethyldisulfide      | n.e.                          |           | +++  |
| c                | Butylacetate           | 826                           |           | +++  |
| d                | Cyclohexanone          | 901                           | ++        | +++  |
| e                | 2,5-Dimethylpyrazine   | 915                           | ++        | ++++ |
|                  | Butylisobutyrate       | 958                           |           | +    |
| f                | Benzaldehyde           | 963                           | ++++      | ++++ |

|    |                                         |      |     |      |
|----|-----------------------------------------|------|-----|------|
| g  | Dimethyltrisulfide                      | 968  | +++ | ++++ |
| h  | Butylbutyrate                           | 997  | ++  | ++   |
| i  | Trimethylpyrazine                       | 999  | ++  | ++++ |
| j  | 2-Acetylthiazole                        | 1016 |     | ++   |
| k  | 2-Ethyl-1-hexanol                       | 1029 | ++  |      |
| l  | Pyrazine, M: 136                        | 1050 | ++  | ++   |
| m  | Acetophenone                            | 1063 | ++  | ++   |
| n  | 2-Ethyl-3,6-dimethylpyrazine            | 1075 | ++  | +++  |
| o  | Pyrazine, M: 136                        | 1082 | +   | ++   |
| p  | 1-Undecene                              | 1088 |     | ++++ |
| q  | Methylbenzoate                          | 1091 |     | +++  |
| r  | Nonanal                                 | 1104 | +   |      |
| s  | m/z: 43, 123, 101, 138                  | 1111 |     | ++   |
| t  | Pyrazine, M: 150                        | 1151 |     | +    |
| u  | 2,6-Di(1-Methylethyl)pyrazine           | 1153 |     | +    |
| v  | Pyrazine, M: 150                        | 1155 |     | +    |
| *  | Silanoxan                               | 1156 | ++  |      |
| w  | Pyrazine, M=164                         | 1193 | +   |      |
|    | Dimethyl-(2-methylpropyl)-pyrazin M=164 | 1196 |     | +    |
| x  | Decanal                                 | 1201 | +   |      |
|    | Dimethyltetrasulfide                    | 1208 |     | ++++ |
|    | 2-Butyl-3,6-dimethylpyrazine            | 1253 | +   | ++   |
| z  | 2-Undecanone                            | 1292 |     | ++   |
|    | m/z: 57, 143, 87, 69, 159               | 1301 | +   |      |
|    | Pyrazine                                | 1302 | +   |      |
| aa | 2,5-Dimethyl-3-(3-methylbutyl)-pyrazine | 1313 | ++  | ++   |
|    | m/z: 69, 43, 85, 111, 154               | 1321 | +   |      |
| ab | m/z: 138, 95, 83, 193, 57               | 1340 | +   |      |
| ac | Nerylmethylthioether                    | 1379 |     | +    |
| ad | Geranylmethylthioether                  | 1396 |     | +++  |
| ae | Tetradecan                              | 1397 | +   |      |
| af | Diphenylmethane                         | 1430 |     | +    |
| ag | Dimethylpentasulfid                     | 1455 |     | ++   |
| *  | Cyclohexadien-1,4-dion-Derivat          | 1470 | +   | +    |
|    | 5-Methyl-2-phenyl-2-hexenal             | 1488 | +   |      |
| *  | Cyclosiloxane                           | 1499 | +   |      |
| *  | 2,4-Bis(1,1-dimethylethyl)-phenol       | 1509 | ++  | ++   |
| ah | Hexadecane                              | 1596 | ++  | +    |
| ai | Hydrocarbon                             | 1677 |     | +    |
| aj | m/z: 109, 82, 135, 121, 150             | 1692 |     | +    |
| ak | Hexathiepan                             | 1707 |     | +    |
|    | m/z: 229, 145, 159, 161, 119            | 1802 | +   |      |
|    | m/z: 157, 143, 185, 270                 | 1857 | +   |      |
| *  | Bis(2-methylpropyl)phthalat             | 1866 | ++  |      |
|    | m/z: 145, 160, 270, 95, 106             | 1905 | +   |      |
|    | m/z: 160, 145, 270, 95, 105             | 1943 | +   |      |
| *  | Dibutylphthalat                         | 1961 | +   | ++   |
| al | Octasulfur                              | 2025 | +   | +++  |

a) Peak in chromatogram, b) Artefacts, c) Abundance relative to the largest peak in the total ion chromatogram: + 0 – 0.5%; ++ 0.5 – 10%; +++ 10 – 30%; ++++ 30 – 100%, d) not determined
